# Supplementary material for: Space rather than vegetation heterogeneity is responsible for structuring dragonfly assemblage at lentic water bodies in Brazilian subtropical grassland
Source: Research Square preprint supplement (doi:10.21203/rs.3.rs-4001066/v1), 2024-03-05
Supplement: Supplementary file 1 [file 998e4ed098755e1ebc9e633a.docx]

**Supplementary Information**

**Space rather than vegetation heterogeneity is responsible for structuring dragonfly assemblage at lentic water bodies in Brazilian subtropical grassland**

**Journal of Insect Conservation**

Luísa Vareira², Jean Carlo Gonçalves Ortega², Leandro Juen², Sebastian Felipe Sendoya¹, Cristiano Agra Iserhard¹

¹ Programa de Pós-graduação em Biodiversidade Animal, Instituto de Biologia, Universidade Federal de Pelotas, Pelotas, Rio Grande do Sul, Brazil.

² Programa de Pós-graduação em Ecologia, Instituto de Ciências Biológicas, Universidade Federal do Pará, Belém, Pará, Brazil.

**Corresponding author:** Luísa Vareira (luisavareira@gmail.com)

**Table S1** List of the lentic water bodies in order from the larger to the smaller ones.

| Site | Lat | Long | Area (m²) | Classification |
| --- | --- | --- | --- | --- |
| CAP3 | -31.797 | -52.503 | 19232.834 | large |
| CAP1 | -31.804 | -52.508 | 13152.491 | large |
| HBI3 | -31.813 | -52.426 | 7209.714 | large |
| HBI1 | -31.807 | -52.42 | 5782.988 | large |
| CAP4 | -31.797 | -52.501 | 4633.523 | large |
| CAP2 | -31.802 | -52.503 | 3437.933 | large |
| EMB2 | -31.816 | -52.45 | 1552.187 | large |
| EMB4 | -31.808 | -52.476 | 996.425 | small |
| EMB1 | -31.783 | -52.415 | 863.243 | small |
| HBI4 | -31.816 | -52.429 | 814.826 | small |
| HBI2 | -31.81 | -52.423 | 725.096 | small |
| EMB3 | -31.807 | -52.472 | 132.903 | small |


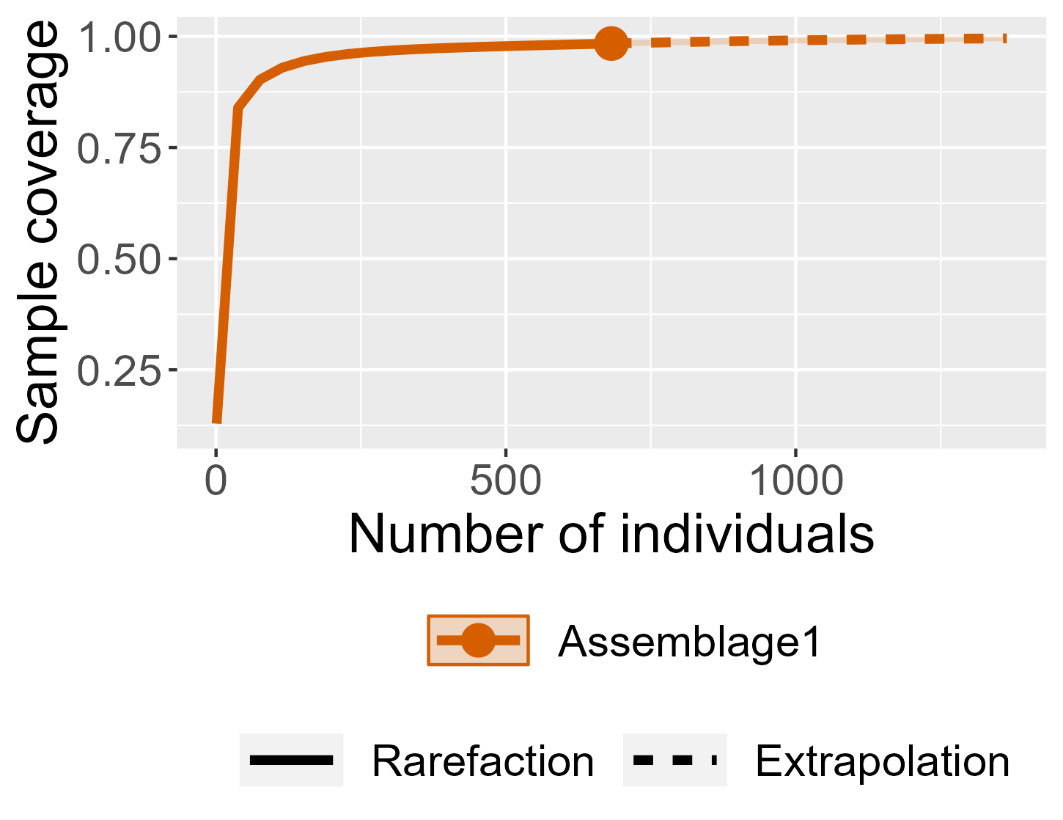


**Figure S1** Sample completeness of the dragonfly species inhabiting grassland water bodies.

**Table S2** List of suborders, families, and species registered in different grassland lakes. All dragonfly species are classified as least concern (LC) category of extinction risk following ICMBio and IUCN red lists.

| **Suborder / Family / Species** | **N** | **Site** |
| --- | --- | --- |
| **Anisoptera** |  |  |
| **Libellulidae** | **499** |  |
| *Brachymesia furcata* Hagen, 1861 | 2 | CAP3, CAP4 |
| *Diastatops obscura* Fabricius, 1775 | 6 | CAP3, CAP4, EMB4 |
| *Erythemis credula* Hagen, 1861 | 3 | CAP4, EMB4 |
| *Erythemis peruviana* Rambur, 1842 | 8 | CAP3, CAP4, EMB2, EMB3, EMB4 |
| *Erythrodiplax atroterminata* Ris, 1911 | 1 | EMB3 |
| *Erythrodiplax basalis* Kirby, 1897 | 46 | CAP2, CAP4, EMB3, EMB4, HBI2, HBI4 |
| *Erythrodiplax connata* Burmeister, 1839 | 1 | CAP2 |
| *Erythrodiplax fusca* Rambur, 1842 | 13 | CAP2, CAP4, EMB3 |
| *Erythrodiplax media* Borror, 1942 | 82 | CAP1, CAP2, CAP3, CAP4, EMB1, EMB2, EMB3, EMB4, HBI1, HBI2, HBI3, HBI4 |
| *Erythrodiplax nigricans* Rambur, 1842 | 170 | CAP1, CAP2, CAP3, CAP4, EMB1, EMB2, EMB3, EMB4, HBI1, HBI2, HBI3, HBI4 |
| *Erythrodiplax pallida* Needham, 1904 | 2 | EMB3 |
| *Erythrodiplax paraguayensis* Förster, 1905 | 54 | CAP1, CAP3, EMB4, HBI1, HBI2, HBI3, HBI4 |
| *Erythrodiplax* sp*.* | 2 | CAP2, EMB4 |
| *Idiataphe longipes* Hagen, 1861 | 7 | CAP3, EMB4 |
| *Miathyria marcella* (Selys in Sagra,1857) | 10 | CAP3, EMB3, HBI3 |
| *Micrathyria catenata* Calvert, 1909 | 21 | CAP1, CAP2, CAP3, CAP4, EMB4 |
| *Micrathyria eximia* Kirby, 1897 | 1 | HBI3 |
| *Micrathyria hypodidyma* Calvert, 1906 | 12 | CAP1, CAP 4, EMB3, HBI4 |
| *Micrathyria* sp*.* | 2 | CAP3, EMB4 |
| *Micrathyria spuria* Selys, 1900 | 8 | CAP2, CAP3, EMB4 |
| *Nephepeltia flavifrons* Karsch, 1889 | 30 | CAP2, CAP3, CAP4, EMB2, EMB3, EMB4 |
| *Pantala flavescens* Fabricius, 1798 | 2 | HBI3 |
| *Perithemis tenera* Say, 1839 | 14 | CAP1, CAP2, CAP3, CAP4, EMB2, EMB3, EMB4, HBI1, HBI3, HBI4 |
| *Tauriphila argo* Hagen, 1869 | 1 | CAP3 |
| *Tramea binotata* Rambur, 1842 | 1 | CAP3 |
| **Zygoptera** |  |  |
| **Coenagrionidae** | **167** |  |
| *Acanthagrion gracile* Rambur,  1842 | 2 | CAP4, EMB3 |
| *Argentagrion ambiguum* Ris, 1904 | 1 | CAP1 |
| *Argia* sp*.* | 1 | CAP3 |
| *Ischnura capreolus* Hagen, 1861 | 26 | CAP1, CAP3, EMB3, EMB4, HBI2 |
| *Ischnura fluviatilis* Selys, 1876 | 130 | CAP1, CAP2, CAP3, CAP4, EMB1, EMB2, EMB3, EMB4, HBI1, HBI2, HBI3, HBI4 |
| *Oxyagrion rubidum* Rambur, 1842 | 1 | CAP3 |
| *Telebasis corallina* Selys, 1876 | 6 | CAP1, CAP3, CAP4 |
| **Lestidae** | 15 |  |
| *Lestes bipupillatus* Calvert, 1909 | 1 | EMB2 |
| *Lestes forficula* Rambur, 1842 | 1 | EMB2 |
| *Lestes paulistus* Calvert, 1909 | 6 | EMB1, EMB2, HBI1, HBI2, HBI3, HBI4 |
| *Lestes spatula* Fraser, 1946 | 5 | EMB2, EMB3 |
| *Lestes undulatus* Say, 1840 | 2 | HBI2, HBI3 |
| **Total** | **681** |  |
